# Supplementary material for: The Hsp70/90 cochaperone, Sti1, suppresses proteotoxicity by regulating spatial quality control of amyloid-like proteins
Source: PubMed Central journal article supplement — Mol Biol Cell. 2013 Dec 1;24(23):3588–602. doi: 10.1091/mbc.E13-06-0315 (PMC3842988; doi:10.1091/mbc.e13-06-0315), 2013-12-01
Supplement: supp_E13-06-0315v1_E13-06-0315.pdf [file supp_E13-06-0315v1_E13-06-0315.pdf]

# Supplemental Materials

*Molecular Biology of the Cell*

Wolfe et al.

## Supplemental Legends

**Supplemental Figure 1.** Sti1 specifically alters Htt103Q-GFP spatial and temporal foci formation. (A) Sgt2 does not suppress the Htt103Q growth defect as monitored by cell growth assay plated in fivefold dilutions. The toxicity assay was plated on synthetic media containing 500uM CuSO<sub>4</sub> to induce Sgt2 expression. (B) Impact of Sti1 upon Htt103Q-GFP foci formation over time. Live images were captured at the indicated times after galactose induction of Htt103Q-GFP. (C) Stability of Htt103Q-GFP foci during Sti1 overexpression as monitored by cycloheximide decay. After 4 h of Htt103Q-GFP induction, cells were treated with cycloheximide, then fixed and imaged at the indicated times. Nuclei were visualized using DAPI staining. (D and E) Influence of (D) CHIP or (E) Sti1 upon Ssa1 and Sis1 chaperone activity as measured by in vitro luciferase activity assay. Chaperones were added at the indicated concentrations to GndHCl treated luciferase and luminescence was measured as a readout for chaperone mediated refolding.

**Supplemental Figure 2.** Sti1 is not required for Rnq1-NLS relocalization of Htt103Q to the nucleus. (A) Lack of Sti1 dependence for Rnq1-mRFP-NLS to target Htt103Q-GFP to the nucleus. Rnq1 was tagged with the SV40 NLS signal and expressed at low levels from the CUP1 promoter as in other Rnq1-mRFP localization studies. Samples expressed either Rnq1-mRFP-NLS, Htt103Q-GFP, or both as indicated. (B) Impact of Sti1 deletion upon foci formation of Htt103Q-GFP containing a proline rich region. Nuclei were visualized using DAPI staining. (C) Sti1 immunoprecipitates with Hsp70 and Hsp90. Analysis of Sti1 and indicated chaperones in complex with Htt103Q in the presence and absence of Htt103Q. Immunoprecipitation was carried out as in Figure 6. Sti1 with a C terminal HA tag was overexpressed from a high copy plasmid under control of its endogenous promoter.

**Supplemental Figure 3.** Other cellular sorting factors are not necessary for Sti1's mechanism of action (A) Impact of deletion of indicated proteins upon Sti1's ability to suppress Htt103Q growth defect as monitored by cell growth assay plated in fivefold dilutions. (B) Impact of deletion of indicated proteins upon Sti1's ability to reorganize Htt103Q-GFP. Toxicity and fluorescence microscopy assays were carried out as in Figure 1.

**Supplemental Figure 4.** Sti1 attenuates Hsp104 shearing activity in the presence of GndHCl (A) Curing rate of [RNQ+] is increased in the presence of GndHCl when Sti1 is overexpressed as indicated by triton solubility assay followed by Western blot. Since [RNQ+] is triton insoluble, we measured the Rnq1 triton solubility from lysates with endogenous and overexpressed Sti1 at the indicated generations post GndHCl treatment. Increased Sti1 does not completely inactivate Hsp104 and cure the cells of [RNQ+] as indicated in the left panel without GndHCl treatment. (B) Quantitation of curing rate in (A) as measured by ratio of soluble to insoluble Rnq1. (C) Sti1 levels increase during heat shock. Protein levels of Sti1 were examined by Western blot analysis during a shift from 25°C to 37°C for 1hr compared to overexpression of Sti1 from a high copy plasmid.

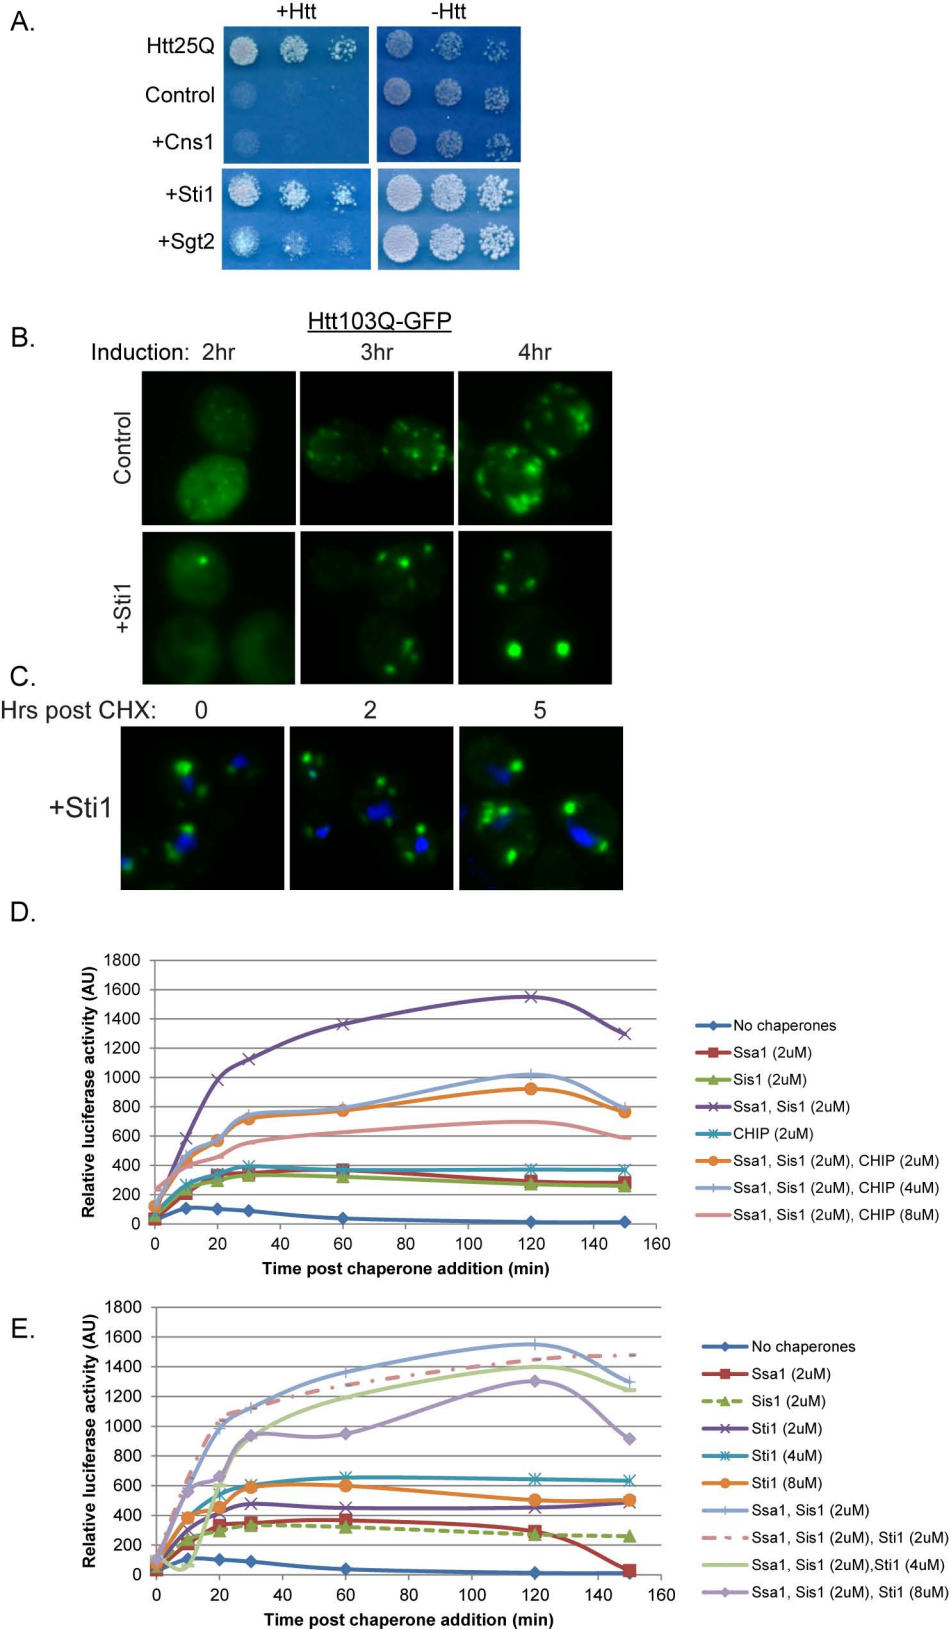

Supplemental Figure 1

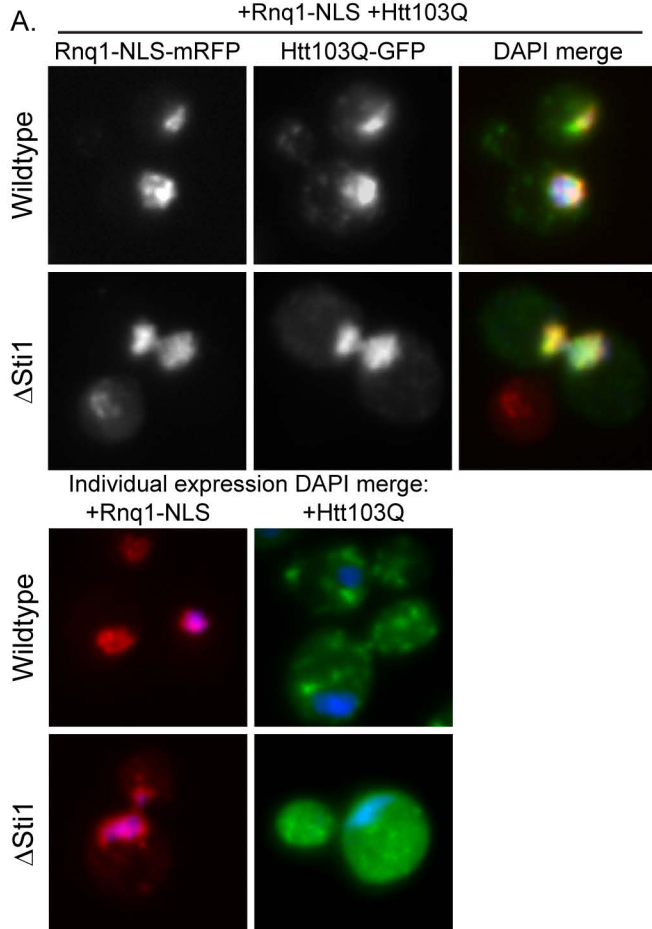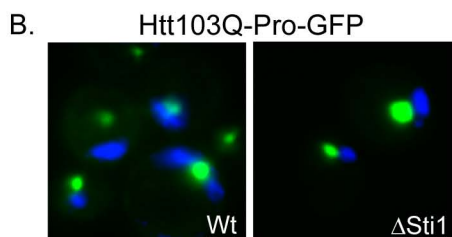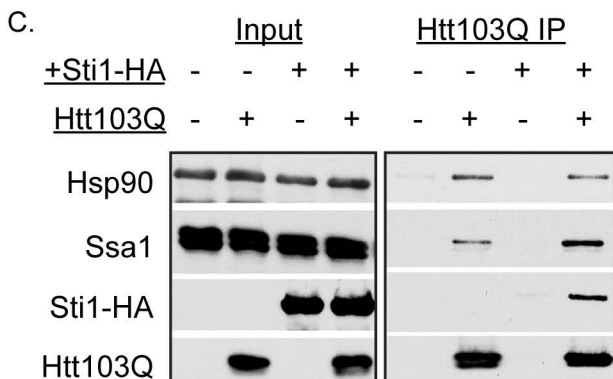

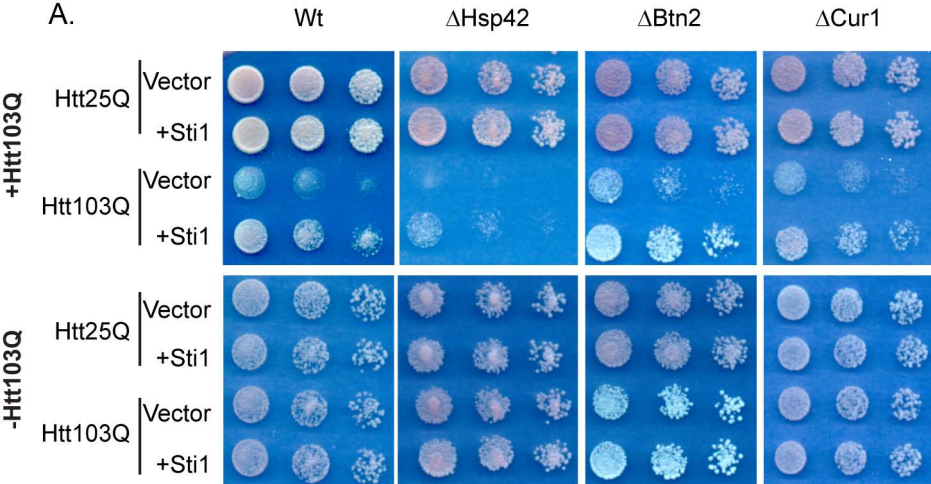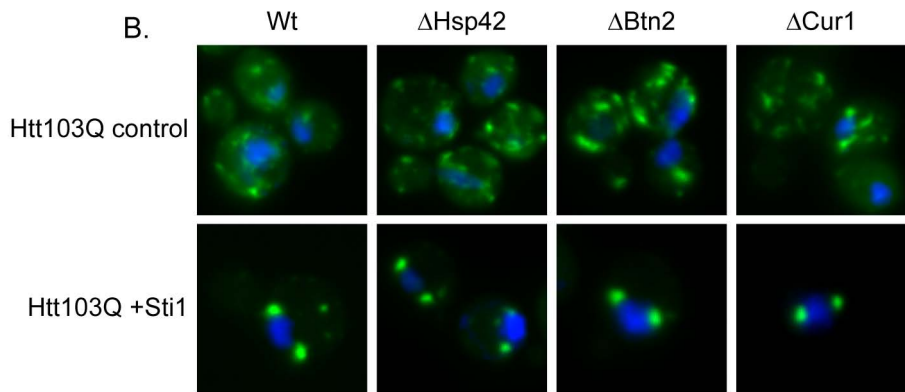

Supplemental Figure 3

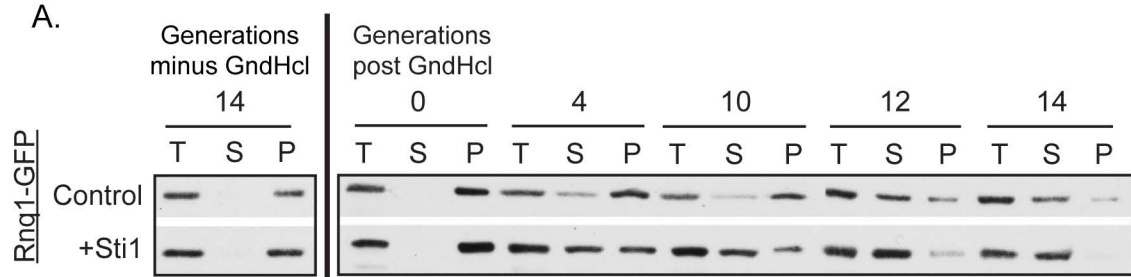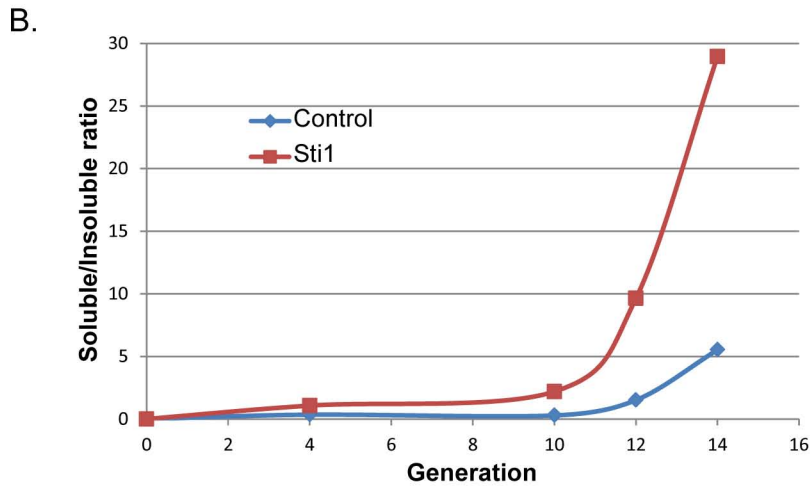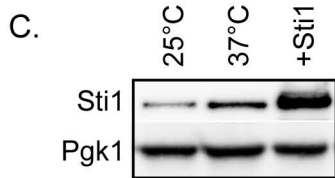

Supplemental Table 1. Yeast Strains

| Strain                                | Genotype                                                                                         | Source          |
|---------------------------------------|--------------------------------------------------------------------------------------------------|-----------------|
| W303, MAT $\alpha$                    | leu2-3,112; trp1-1; can1-100; ura3-1; ade2-1; his3-11,15                                         | Open Biosystems |
| Htt25Q, MAT $\alpha$                  | leu2-3,112; trp1-1; can1-100; ura3-1; ade2-1; his3-11,15; LEU2::Htt25Q                           | This study      |
| Htt103Q, MAT $\alpha$                 | leu2-3,112; trp1-1; can1-100; ura3-1; ade2-1; his3-11,15; LEU2::Htt103Q                          | This study      |
| W303 $\Delta sti1$ , MAT $\alpha$     | leu2-3,112; trp1-1; can1-100; ura3-1; ade2-1; his3-11,15; sti1 $\Delta$ ::KanMX4                 | This study      |
| Htt25Q $\Delta sti1$ , MAT $\alpha$   | leu2-3,112; trp1-1; can1-100; ura3-1; ade2-1; his3-11,15; sti1 $\Delta$ ::KanMX4; LEU2::Htt25Q   | This study      |
| Htt103Q $\Delta sti1$ , MAT $\alpha$  | leu2-3,112; trp1-1; can1-100; ura3-1; ade2-1; his3-11,15; sti1 $\Delta$ ::KanMX4; LEU2::Htt103Q  | This study      |
| Htt25Q $\Delta hsp42$ , MAT $\alpha$  | leu2-3,112; trp1-1; can1-100; ura3-1; ade2-1; his3-11,15; hsp42 $\Delta$ ::KanMX4; LEU2::Htt25Q  | This study      |
| Htt103Q $\Delta hsp42$ , MAT $\alpha$ | leu2-3,112; trp1-1; can1-100; ura3-1; ade2-1; his3-11,15; hsp42 $\Delta$ ::KanMX4; LEU2::Htt103Q | This study      |
| Htt25Q $\Delta btn2$ , MAT $\alpha$   | leu2-3,112; trp1-1; can1-100; ura3-1; ade2-1; his3-11,15; btn2 $\Delta$ ::KanMX4; LEU2::Htt25Q   | This study      |
| Htt103Q $\Delta btn2$ , MAT $\alpha$  | leu2-3,112; trp1-1; can1-100; ura3-1; ade2-1; his3-11,15; btn2 $\Delta$ ::KanMX4; LEU2::Htt103Q  | This study      |
| Htt25Q $\Delta cur1$ , MAT $\alpha$   | leu2-3,112; trp1-1; can1-100; ura3-1; ade2-1; his3-11,15; cur1 $\Delta$ ::KanMX4; LEU2::Htt25Q   | This study      |
| Htt103Q $\Delta cur1$ , MAT $\alpha$  | leu2-3,112; trp1-1; can1-100; ura3-1; ade2-1; his3-11,15; cur1 $\Delta$ ::KanMX4; LEU2::Htt103Q  | This study      |
| Sis1GFP                               | BY4741 MAT a; his3 $\Delta$ ; leu2 $\Delta$ ; met15 $\Delta$ ; ura3 $\Delta$ ; SIS1-GFP::HIS3    | Invitrogen      |
| Hsp42GFP                              | BY4741 MAT a; his3 $\Delta$ ; leu2 $\Delta$ ; met15 $\Delta$ ; ura3 $\Delta$ ; Hsp42-GFP::HIS3   | Invitrogen      |
| Spc42GFP                              | BY4741 MAT a; his3 $\Delta$ ; leu2 $\Delta$ ; met15 $\Delta$ ; ura3 $\Delta$ ; Spc42-GFP::HIS3   | Invitrogen      |

Supplemental Table 2. Plasmids

| Plasmid                           | Source              |
|-----------------------------------|---------------------|
| pRS305-GAL1-FLAG-Htt25Q-GFP       | This study          |
| pRS305-GAL1-FLAG-Htt103Q-GFP      | This study          |
| pRS426-CUP1-FLAG-Htt103Q-GFP      | This study          |
| pRS423-CUP1-Rnq1-mRFP             | This study          |
| pRS315-CUP1-Rnq1-mRFP             | Douglas et al, 2009 |
| pRS315-CUP1-Rnq1-GFP              | Douglas et al, 2008 |
| pRS316-CUP1-Rnq1-mRFP-NLS         | Douglas et al, 2009 |
| yEPlac-Sti1 (endogenous promoter) | Vitaly Kushnirov    |
| yEPlac-Sti1 point mutations       | This study          |
| yEPlac-Sti1-mRFP                  | This study          |
| pRS426-ACT1-mCitrine-Luciferase   | This study          |
| pRS316-CUP1-Sgt2                  | This study          |
| Yep24-Cns1                        | Zuehlke et al, 2012 |
| pRS414-GPD-Sis1                   | Douglas et al, 2008 |
| Addgene plasmid 15583:            |                     |
| pRS416-GAL1-Htt103Q-GFP           | Susan Lindquist     |



Supplemental Table 3. Antibodies

| Antibody        | Host   | Source           | Catalogue number |
|-----------------|--------|------------------|------------------|
| GFP             | Mouse  | Roche            | 11814460001      |
| Flag            | Mouse  | Sigma            | F3165            |
| RFP             | Rabbit | Rockland         | 600-401-379      |
| Sti1            | Rabbit | This study       |                  |
| Pgk1            | Mouse  | Molecular Probes | A-6457           |
| Hsp104          | Rabbit | Stressgen        | SPA-1040         |
| Ssa1            | Rabbit | Lee et al, 2002  |                  |
| Sis1            | Rabbit | Lee et al, 2002  |                  |
| Ydj1            | Rabbit | Lee et al, 2002  |                  |
| Hsp42           | Rabbit | Johanes Buchner  |                  |
| anti-mouse HRP  | Goat   | Thermo           | 31436            |
| anti-rabbit HRP | Goat   | Thermo           | 31461            |

---
